# Supplementary material for: Risk-adjusted decision making can help protect food supply and farmer livelihoods in West Africa
Source: Springer Nature journal article supplement (doi:10.1038/s43247-024-01242-9), 2024-02-24
Supplement: 43247_2024_1242_MOESM1_ESM.pdf [file 43247_2024_1242_MOESM1_ESM.pdf]

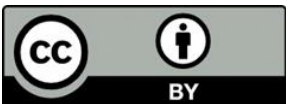

**Open Access** This file is licensed under a Creative Commons Attribution 4.0 International License, which permits use, sharing, adaptation, distribution and reproduction in any medium or format, as long as you give appropriate credit to the original author(s) and the source, provide a link to the Creative Commons license, and indicate if changes were made. In the cases where the authors are anonymous, such as is the case for the reports of anonymous peer reviewers, author attribution should be to 'Anonymous Referee' followed by a clear attribution to the source work. The images or other third party material in this file are included in the article's Creative Commons license, unless indicated otherwise in a credit line to the material. If material is not included in the article's Creative Commons license and your intended use is not permitted by statutory regulation or exceeds the permitted use, you will need to obtain permission directly from the copyright holder. To view a copy of this license, visit <http://creativecommons.org/licenses/by/4.0/>.

*Web links to the author's journal account have been redacted from the decision letters as indicated to maintain confidentiality*

*This manuscript has been previously reviewed at another Nature Portfolio journal. This document only contains reviewer comments and rebuttal letters for versions considered at Communications Earth & Environment.*

18th Dec 23

Dear Dr Wildemeersch,

Your manuscript titled "Risk-Adjusted Strategies to Protect Food Supply and Farmer Livelihoods in West Africa" has now been seen by our reviewers, whose comments appear below. In light of their advice we are delighted to say that we are happy, in principle, to publish a suitably revised version in Communications Earth & Environment under the open access CC BY license (Creative Commons Attribution v4.0 International License).

We therefore invite you to revise your paper one last time to address the remaining concerns of our reviewers. At the same time we ask that you edit your manuscript to comply with our format requirements and to maximise the accessibility and therefore the impact of your work.

#### EDITORIAL REQUESTS:

Please review our specific editorial comments and requests regarding your manuscript in the attached "Editorial Requests Table".

\*\*\*\*\*Please take care to match our formatting and policy requirements. We will check revised manuscript and return manuscripts that do not comply. Such requests will lead to delays. \*\*\*\*\*

Please outline your response to each request in the right hand column. Please upload the completed table with your manuscript files as a Related Manuscript file.

If you have any questions or concerns about any of our requests, please do not hesitate to contact me.

#### SUBMISSION INFORMATION:

In order to accept your paper, we require the files listed at the end of the Editorial Requests Table; the list of required files is also available at <https://www.nature.com/documents/commsj-file-checklist.pdf>.

#### OPEN ACCESS:

Communications Earth & Environment is a fully open access journal. Articles are made freely accessible on publication under a [CC BY license](http://creativecommons.org/licenses/by/4.0) (Creative Commons Attribution 4.0 International License). This license allows maximum dissemination and re-use of open access materials and is preferred by many research funding bodies.

For further information about article processing charges, open access funding, and advice and support from Nature Research, please visit <https://www.nature.com/commsenv/article-processing-charges>

At acceptance, you will be provided with instructions for completing this CC BY license on behalf of

all authors. This grants us the necessary permissions to publish your paper. Additionally, you will be asked to declare that all required third party permissions have been obtained, and to provide billing information in order to pay the article-processing charge (APC).

Please use the following link to submit the above items:

[link redacted]

\*\* This url links to your confidential home page and associated information about manuscripts you may have submitted or be reviewing for us. If you wish to forward this email to co-authors, please delete the link to your homepage first \*\*

We hope to hear from you within two weeks; please let us know if you need more time.

Best regards,

Martina Grecequet, PhD  
Associate Editor,  
Communications Earth & Environment  
@CommsEarth

#### REVIEWERS' COMMENTS:

Reviewer #1 (Remarks to the Author):

I have provided a referee report on an earlier version of this submission, and the authors have duly prepared an itemization of the changes they have carried out in response to those comments. I am pleased to confirm that they have satisfactorily incorporated my feedback.

My evaluation of this paper is that it offers insightful analyses of the mechanisms that can prove helpful in seeking to mitigate food shortages. There are admittedly additional phenomena that could be considered in the analysis (e.g., correlations in the weather patterns of neighboring regions). Yet introducing such a level of detail could detract from the paper's readability whilst it could prove challenging to validate such more detailed models (in fact, the eventual food shortages may depend on how (un)stable the political situation in West Africa remains, during the last four years, there have been seven military coups in Central and West Africa; yet such developments are practically impossible to predict).

Against this background, I recommend that this paper be accepted for publication essentially "as is"; but in preparing their final version of the paper, they may wish to clarify the positioning of their work relative to those uncertainties that their model does not capture.

Reviewer #4 (Remarks to the Author):

The authors have satisfactorily addressed my comments and feedback, and I have no further comments at this stage.
